# Supplementary material for: The Extraordinary Evolutionary History of the Reticuloendotheliosis Viruses
Source: PLoS Biol. 2013 Aug 27;11(8):e1001642. doi: 10.1371/journal.pbio.1001642 (PMC3754887; doi:10.1371/journal.pbio.1001642)
Supplement: Figure S2 — An alignment of REV LTR sequences, showing the presence of unique shared indels (insertions and deletions) that support the monophyletic relationship of the three sequences highlighted in gray, which include (i) the HA9901 strain of REV, (ii) REV plasmid (pREVA6), and (iii) a REV LTR insertion present in the JM-Hi3 strain of GHV-2. Shared indels are indicated by boxes. (PDF) [file pbio.1001642.s002.pdf]

Fig. S2

|               |            |            |            |            |            |            |            |            |            |            |            |            |     |
|---------------|------------|------------|------------|------------|------------|------------|------------|------------|------------|------------|------------|------------|-----|
| SNV           | TGTGGGAGGG | AGCTCTGGGG | GGAATAGTGC | TGGCTCGCTA | ACTGCTATAT | TAGCTTCTGT | ACCCATGCTT | GCTTGCCTGG | CCACTAACCG | CCATATTAGC | TTCTGTACAC | ATGCTTGCTT | 120 |
| DIAB          | .....      | .....C.... | .....C..   | .....      | .....CG... | .....      | ..AT.....  | .....--    | -----      | -----      | -----      | -----      |     |
| REV-HA9901    | .....      | .....C.... | .....C..   | .....      | .....CG... | .....      | ..AT.....  | .....--    | -----      | -----      | -----      | -----      |     |
| pREVA6        | .....      | .....C.... | .....C..   | .....      | .....C.... | .....      | ..AT.....  | .....--    | -----      | -----      | -----      | -----      |     |
| GHV2 JM-Hi3   | .....      | .....C.... | .....C..   | .....      | .....C.... | .....      | ..AT.....  | .....--    | -----      | -----      | -----      | -----      |     |
| REV-3410/06   | .....      | .....C.... | .....C..   | .....      | .....C.... | .....      | ..AT.....  | .....--    | -----      | -----      | -----      | -----      |     |
| REV-33337/05  | .....      | .....C.... | .....C..   | .....      | .....C.... | .....      | ..AT.....  | .....--    | -----      | -----      | -----      | -----      |     |
| REV-ZD0708    | .....      | .....C.... | .....C..   | .....      | .....C.... | .....      | ..AT.....  | .....--    | -----      | -----      | -----      | -----      |     |
| REV-APC       | .....      | .....C.... | .....C..   | .....      | .....C.... | .....      | ..AT.....  | .....--    | -----      | -----      | -----      | -----      |     |
| REV-HLJR0901  | .....      | .....C.... | .....C..   | .....      | .....C.... | .....      | ..AT.....  | .....--    | -----      | -----      | -----      | -----      |     |
| FVPV-IL field | .....      | .....C.... | .....C..   | .....      | .....C.... | .....      | ..AT.....  | .....--    | -----      | -----      | -----      | -----      |     |

|               |            |            |            |            |            |            |            |            |              |            |            |            |     |
|---------------|------------|------------|------------|------------|------------|------------|------------|------------|--------------|------------|------------|------------|-----|
| SNV           | GCCTTAGCCG | CCATTGTACT | TGATATGCCA | TTTCTCGGAA | TCGGCATCAA | GTCTCGCTTC | TCGGAATCGG | CATCAAGTTT | CGCTTCTCGA   | AATCGGCGTC | ATTTCTCGGC | ATCGAGAGCA | 240 |
| DIAB          | ----C..... | ....AA...C | .A.....    | .....      | .....      | .....      | .....A     | .....      | .....T.....  | ....A..... | .....      | .....      |     |
| REV-HA9901    | ----       | .....      | .....      | ....G.T..- | -----      | -.A..AT..  | .....A.    | .....      | ....T....G.. | .....      | ....A..... | .....      |     |
| pREVA6        | ----       | .....      | .....      | ....G.T..- | -----      | -.A..AT..  | .....      | .....      | ....T....G.. | .....      | ....A..... | .....      |     |
| GHV2 JM-Hi3   | ----       | .....      | .....      | ....G.T..- | -----      | -.A..AT..  | .....      | .....      | ....T....G.. | .....      | ....A..... | .....      |     |
| REV-3410/06   | ----       | .....      | .....      | ....G.T..- | -----      | -.A..AT..  | .....      | .....      | .....        | .....      | .....      | .....      |     |
| REV-33337/05  | ----       | .....      | .....      | ....G.T..- | -----      | -.A..AT..  | .....      | .....      | .....        | .....      | .....      | .....      |     |
| REV-ZD0708    | ----       | .....      | .....      | ....G.T..- | -----      | -.A..AT..  | .....      | .....      | .....        | .....      | .....      | .....      |     |
| REV-APC       | ----       | .....      | .....      | ....G.T..- | -----      | -.A..AT..  | .....      | .....      | .....        | .....      | .....      | .....      |     |
| REV-HLJR0901  | ----       | .....      | .....      | ....G.T..- | -----      | -.A..AT..  | .....      | .....      | .....        | .....      | .....      | .....      |     |
| FVPV-IL field | ----       | .....      | .....      | ....G.T..- | -----      | -.A..AT..  | .....      | .....      | .....        | .....      | .....      | .....      |     |

|               |            |            |            |            |            |            |            |            |            |            |            |            |     |
|---------------|------------|------------|------------|------------|------------|------------|------------|------------|------------|------------|------------|------------|-----|
| SNV           | AGCTCATAAA | CCATAAAAGG | AAATGTGTAT | TGAAGGCAAG | CATCAGACCA | CTTGCGCCAT | CCAATCACGA | ACGAACACGA | GATCGGACTA | TCATACTGAG | CCAATGGTTG | TAAAGGGCAG | 360 |
| DIAB          | .....C..   | .....      | G.....TG   | .....      | .....      | .....      | .....      | .....      | .....      | .....      | .....T...  | .....      |     |
| REV-HA9901    | G.....G.   | .....      | ....T.G.   | ....G.     | .....G..   | .....      | .....      | G.A.....   | ....A....  | .....      | .....      | .....      |     |
| pREVA6        | G.....G.   | .....      | ....TCG.   | ....G..G.. | .....      | .....      | .....      | G.A.....   | ....A....  | .....      | .....      | .....      |     |
| GHV2 JM-Hi3   | G.....G.   | .....      | ....T.G.   | ....G..N.. | .....      | .....      | .....      | G.A.....   | ....A....  | .....      | .....      | .....      |     |
| REV-3410/06   | G.....     | .....      | ....T.G.   | .....      | .....      | ....A....  | .....      | A.....     | ....A....  | .....      | .....      | .....      |     |
| REV-33337/05  | G.....     | .....      | ....T.G.   | .....      | .....      | ....A....  | .....      | A.....     | ....A....  | .....      | .....      | .....      |     |
| REV-ZD0708    | G.....     | .....      | ....T.G.   | .....      | .....      | ....A....  | .....      | A.....     | ....A....  | .....      | .....      | .....      |     |
| REV-APC       | G.....     | .....      | ....T.G.   | .....      | .....      | ....A....  | .....      | A.....     | ....A....  | .....      | .....      | .....      |     |
| REV-HLJR0901  | G.....     | .....      | ....T.G.   | .....      | .....      | ....A....  | .....      | A.....     | ....A....  | .....      | .....      | .....      |     |
| FVPV-IL field | G.....     | .....      | ....T.G.   | .....      | .....      | ....A....  | .....      | A.....     | ....A....  | .....      | .....      | .....      |     |

|               |            |            |            |            |            |            |            |            |            |            |            |            |     |
|---------------|------------|------------|------------|------------|------------|------------|------------|------------|------------|------------|------------|------------|-----|
| U3   R        |            |            |            |            |            |            |            |            |            |            |            |            |     |
| SNV           | ATGCTACTCT | CCAATAAGGG | AAAATGTCAT | GTAACACCCT | GTAAGCTGTA | AGCGGCTATA | TAAGCCGGGT | ACATCTCTTG | CTCGGGGTCG | CCGTCCTACA | CATTGTTGTT | GTGACGTGCG | 480 |
| DIAB          | ..A..G.... | .....G.... | .....C     | ..C...T..  | ....       | .....      | .....A.A   | ..C.....   | .....      | .....      | .....      | .....      |     |
| REV-HA9901    | ....TC..   | .....G.... | .....      | ..C...T..  | ....       | .....      | .....A.    | G..C.....  | .....      | .....      | .....      | .....      |     |
| pREVA6        | ....TC..   | .....G.... | .....      | ..C...T..  | ....       | .....      | .....A.    | G.....     | .....      | .....      | .....      | ....C..    |     |
| GHV2 JM-Hi3   | ....TC..   | .....G.... | .....      | ..C...T..  | ....       | .....      | .....A.    | G.....     | .....      | .....      | .....      | ....C..    |     |
| REV-3410/06   | ....TC..   | .....G.... | .....      | ..C...T..  | ....       | .....      | .....A.    | G.....     | .....      | .....      | .....      | ....       |     |
| REV-33337/05  | ....TC..   | .....G.... | .....      | ..C...T..  | ....       | .....      | .....A.    | G.....     | .....      | .....      | .....      | ....       |     |
| REV-ZD0708    | ....TC..   | .....G.... | .....      | ..C...T..  | ....       | .....      | .....A.    | G.....     | .....      | .....      | .....      | ....       |     |
| REV-APC       | ....TC..   | .....G.... | .....      | ..C...T..  | ....       | .....      | .....A.    | G.....     | .....      | .....      | .....      | ....       |     |
| REV-HLJR0901  | ....TC..   | .....G.... | .....      | ..C...T..  | ....       | .....      | .....A.    | G.....     | .....      | .....      | .....      | ....       |     |
| FVPV-IL field | ....TC..   | .....G.... | .....      | ..C...T..  | ....       | .....      | .....A.    | G.....     | .....      | .....      | .....      | ....       |     |

|               |           |            |            |            |            |            |            |            |            |            |            |            |     |
|---------------|-----------|------------|------------|------------|------------|------------|------------|------------|------------|------------|------------|------------|-----|
| R   U5        |           |            |            |            |            |            |            |            |            |            |            |            |     |
| SNV           | GCCAGATTC | GAATCTGTAA | TAAAACTTTT | TTTTTCTGAA | TCCTCAGATT | GGCAGTGAGA | GGAGATTTTG | TTCGTGGTGT | TGGCTCGCCT | ACTGGGTGGG | CGCAGGGATC | CGGACTGAAT | 600 |
| DIAB          | .....     | .....      | .....      | ..C....    | .....      | .....      | .....      | .....      | .....      | .....      | T.....     | .....      |     |
| REV-HA9901    | .....     | .....      | ....G.     | ..C...AT.  | .....      | .....      | .....      | .....      | A...G....  | .....      | -.TT.....  | .....      |     |
| pREVA6        | .....     | .....      | ....G.     | ..C...AT.  | .....      | .....      | .....      | .....      | A...G....  | .....      | -.T...G..  | .....      |     |
| GHV2 JM-Hi3   | .....     | .....      | ....T.     | ..C...AT.  | .....      | ....GT..   | .....      | .....      | A...G....  | .....      | -.T.....   | .....      |     |
| REV-3410/06   | .....     | .....      | ....GC..   | ..C...AT.  | .....      | .....      | .....      | .....      | ...G....   | .....      | -.T.....   | .....      |     |
| REV-33337/05  | .....     | .....      | ....GC..   | ..C...AT.  | .....      | .....      | .....      | .....      | ...G....   | .....      | -.T.....   | .....      |     |
| REV-ZD0708    | .....     | .....      | ....GC..   | ..C...AT.  | .....      | .....      | .....      | .....      | ...G....   | .....      | -.T.....   | .....      |     |
| REV-APC       | .....     | .....      | ....GC..   | ..C...AT.  | .....      | .....      | .....      | .....      | ...G....   | .....      | -.T.....   | .....      |     |
| REV-HLJR0901  | .....     | .....      | ....GC..   | ..C...AT.  | .....      | .....      | .....      | .....      | ...G....   | .....      | -.T.....   | .....      |     |
| FVPV-IL field | .....     | .....      | ....GC..   | ..C...AT.  | .....      | .....      | .....      | .....      | ...G....   | .....      | -.T.....   | .....      |     |

|               |            |        |     |
|---------------|------------|--------|-----|
| SNV           | CCGTAGTACT | TCGG   | 614 |
| DIAB          | .....      | .....  |     |
| REV-HA9901    | .....A.T.  | ....T. |     |
| pREVA6        | .....T.    | ....A  |     |
| GHV2 JM-Hi3   | .....T.    | ....T. |     |
| REV-3410/06   | .....T.    | .....  |     |
| REV-33337/05  | .....T.    | .....  |     |
| REV-ZD0708    | .....T.    | .....  |     |
| REV-APC       | .....T.    | .....  |     |
| REV-HLJR0901  | .....T.    | .....  |     |
| FVPV-IL field | .....T.    | .....  |     |
